# Supplementary material
Source: Elsevier journal article supplement (https://rcastoragev2.blob.core.windows.net/6e1914cbc379307a84e48d28e36f2ff9/mmc1.pdf)
Supplement: mmc1 [file mmc1.pdf]

**Molecular Cell, Volume 82**

**Supplemental information**

**Heat shock induces premature  
transcript termination and reconfigures  
the human transcriptome**

**Simona Cugusi, Richard Mitter, Gavin P. Kelly, Jane Walker, Zhong Han, Paola Pisano, Michael Wierer, Aengus Stewart, and Jesper Q. Svejstrup**

## SUPPLEMENTARY FIGURES WITH LEGENDS

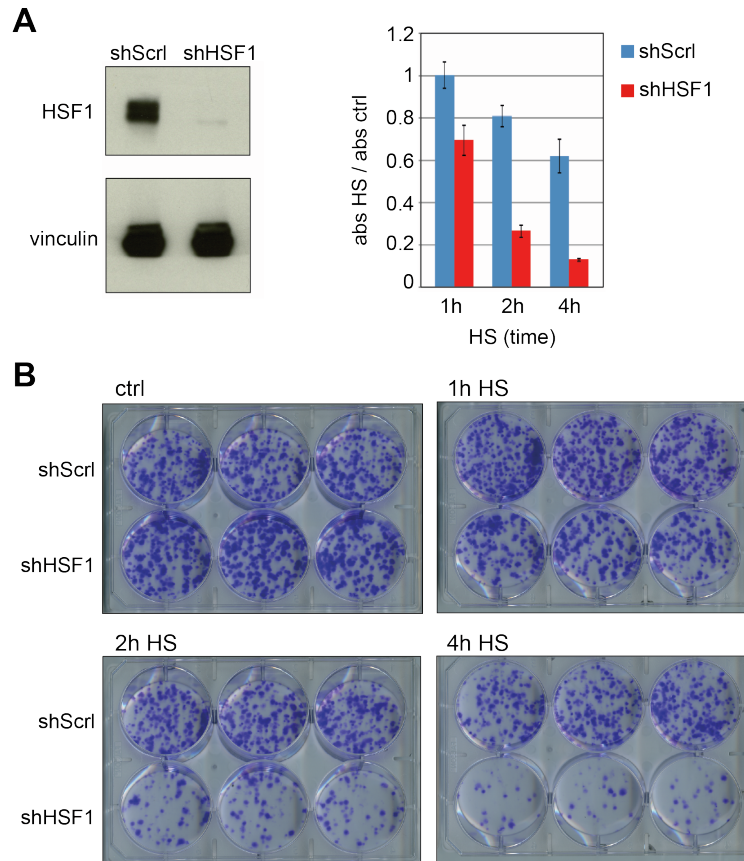

**Figure S1. Cellular response to heat shock, related to Figure 1.**

**A. Left**, western blot analysis showing HSF1 knockdown in the shHSF1 cell line. Vinculin is used as a loading control. **Right**, Crystal violet quantification from HS treated cells normalised to untreated ctrl. Average of three biological replicates, error bars indicate  $\pm$ SD. **B**. Representative example of colony formation for HS survival assay (in triplicate).

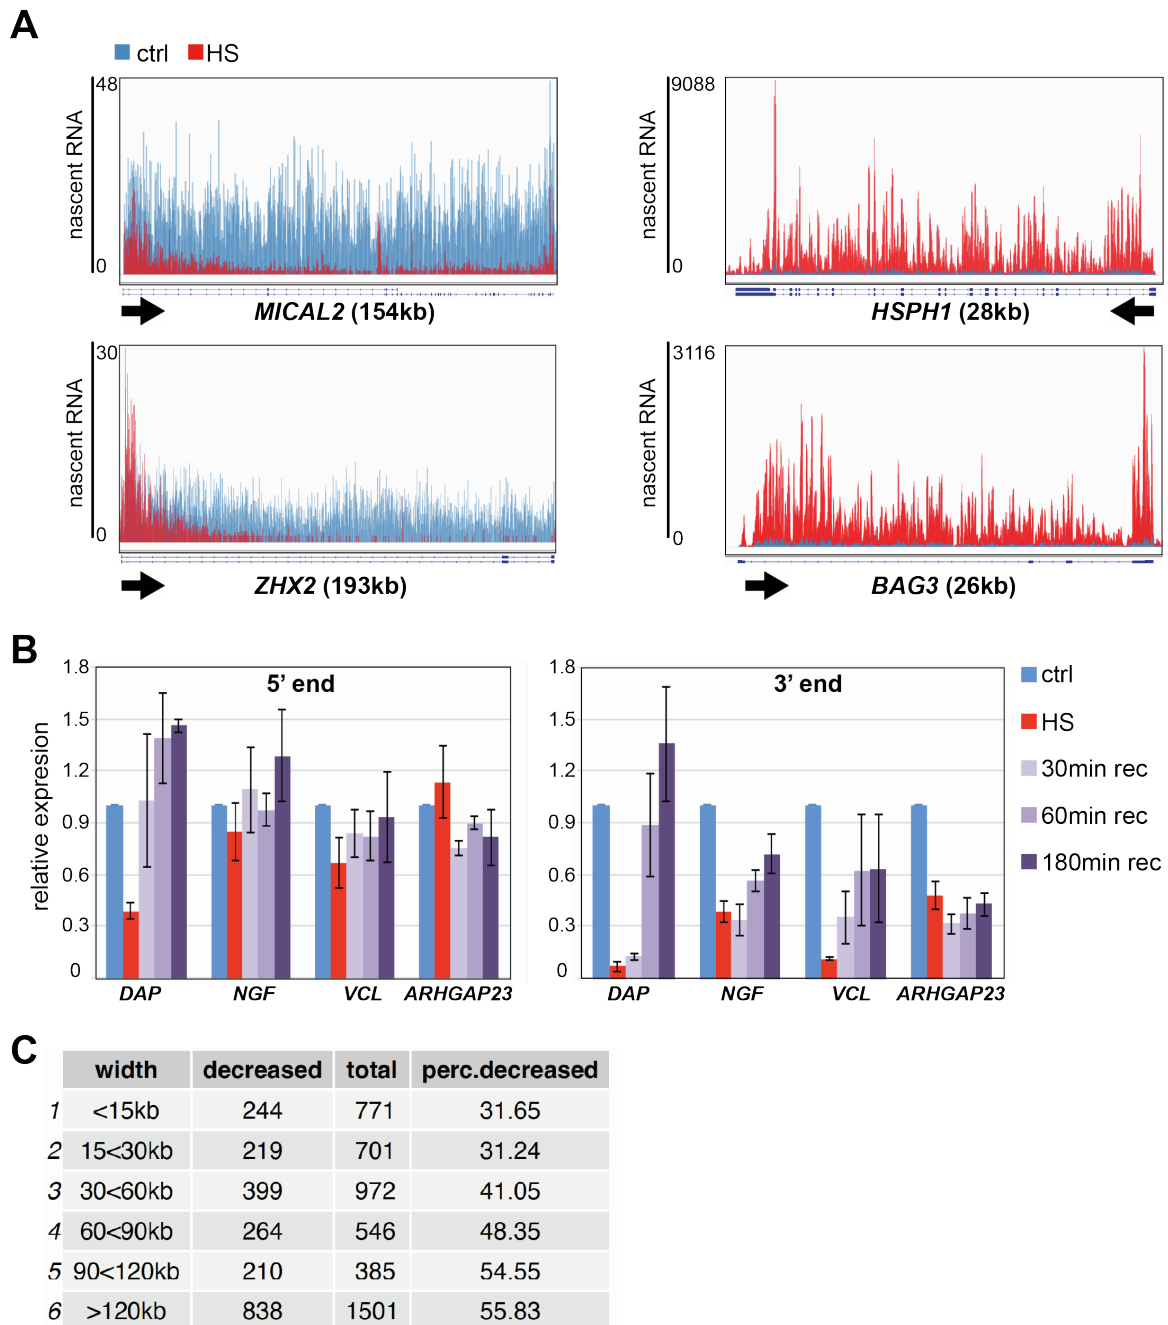

**Figure S2. Defective transcript elongation after heat shock, related to Figure 1.**

**A.** IGV genome browser view of TT<sub>chem</sub>-seq for genes down-regulated (*MICAL2* and *ZHX2*) or up-regulated (*HSPH1* and *BAG3*) after HS. **B.** qPCR quantification of nascent RNA near the 5'-end or the 3'-end of downregulated genes at various times after HS, relative to *GAPDH*, normalized to the control. Average of three biological replicates; error bars indicate  $\pm$ SD. **C.** Percentage of genes downregulated >1.5 fold (activity in the 3' end of gene (last 25%) compared to first 5% of gene between conditions, *i.e.* HS(3'/5')/ctrl(3'/5')), by gene length.

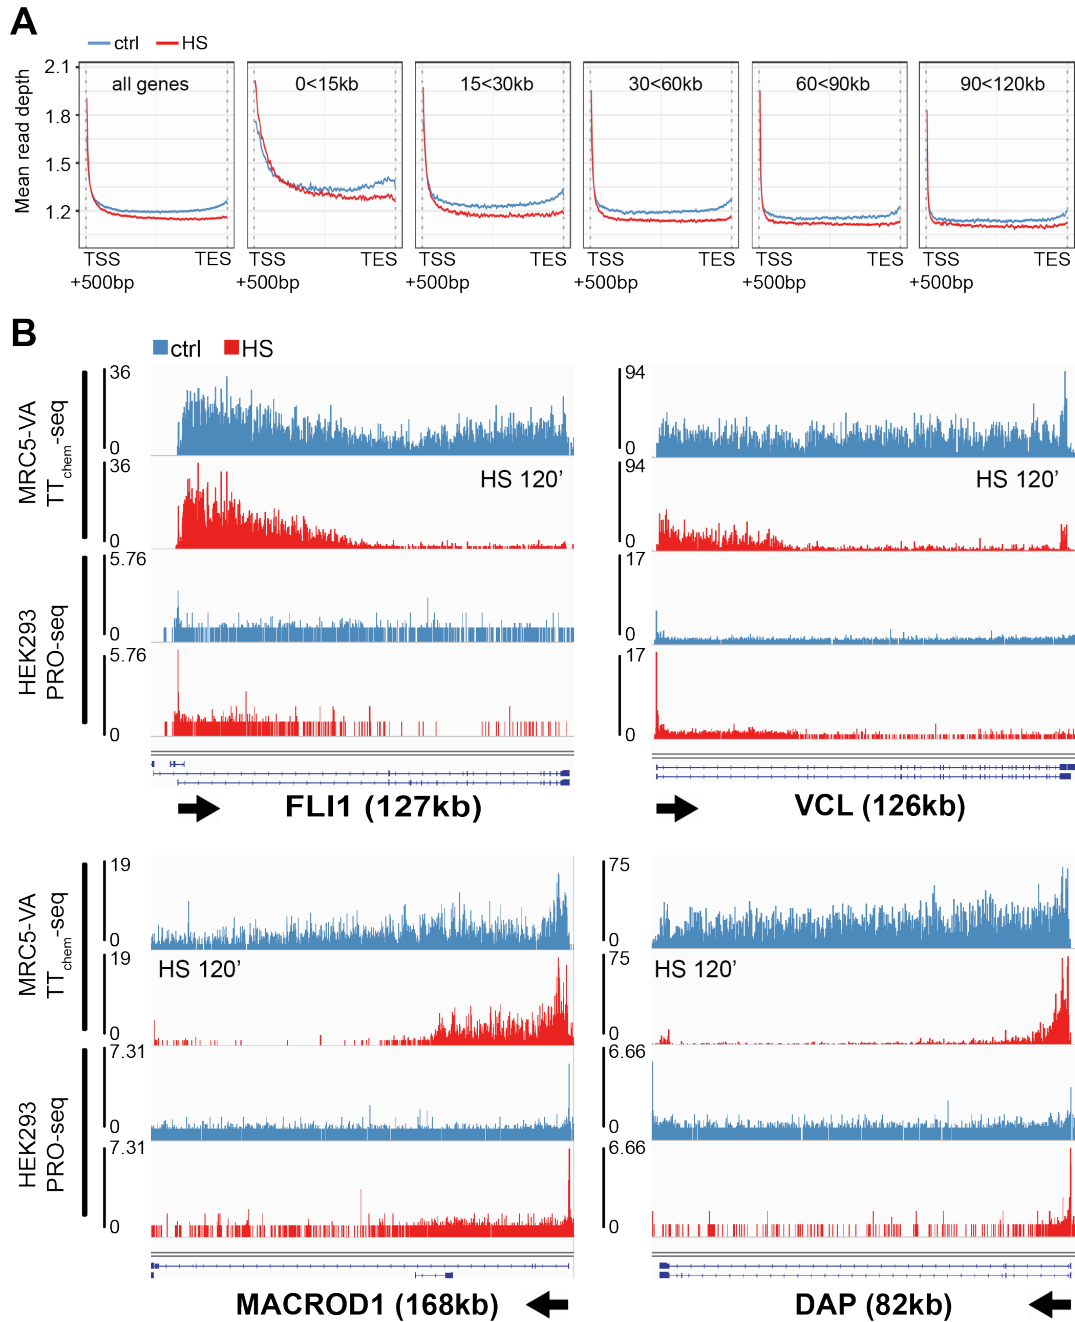

**Figure S3. Defective transcript elongation after heat shock in HEK293 cells, related to Figure 1. A.** Coverage plots of PRO-seq data from Aprile-Garcia et al., 2019 stratified by gene length, obtained by aligning genes at position +500 bp relative to the TSS, *i.e.*, at a point downstream from the promoter-proximal pause site. **B.** Examples of IGV genome browser views of same PRO-seq data for the *FLI1*, *VCL*, *MACROD1*, and *DAP* genes. Arrows indicate the direction of transcription.



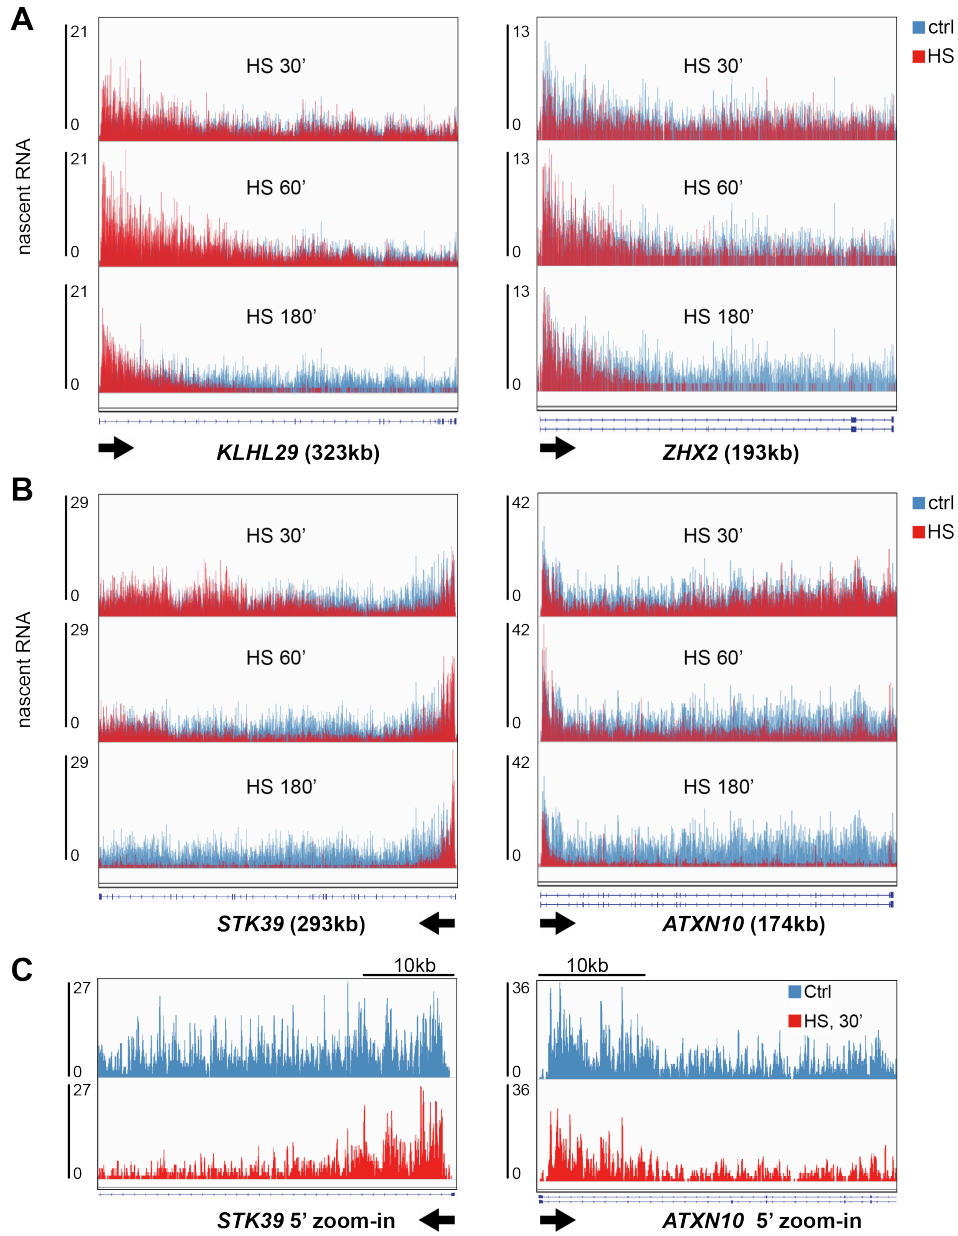

**Figure S4. Transcription during a HS time course, related to Figure 2.**

**A.** IGV genome browser view of TT<sub>chem</sub>-seq for *KLHL29* and *ZHX2* in cells exposed to a HS time course. **B.** As in A, but for *STK39* and *ATXN10*. **C.** Zoom-in detail of B, 5' gene ends.

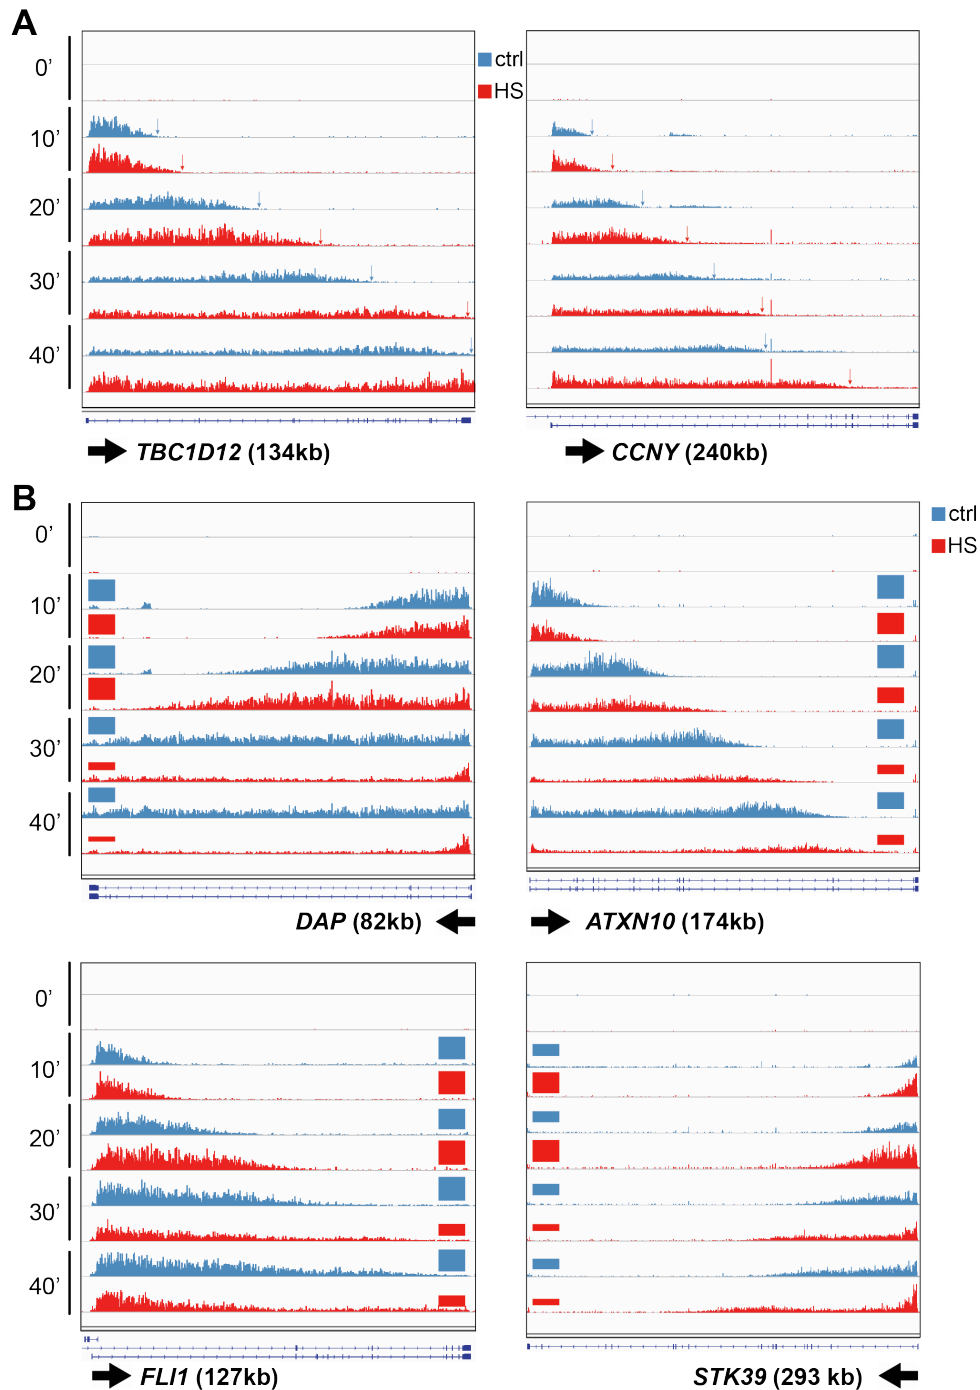

**Figure S5. Transcript elongation measurement after heat shock, related to Figure 3.**

**A.** IGV genome browser view of DRB/TT<sub>chem</sub>-seq for the *TBC1D12* and *CCNY* genes. **B.** As in A, but for *DAP*, *ATXN10*, *FLI1* and *STK39*. Note the gradual decrease in the level of transcription activity over time in the HS-treated samples (summarized by the colored squares, positioned at the ends of genes for simplicity).

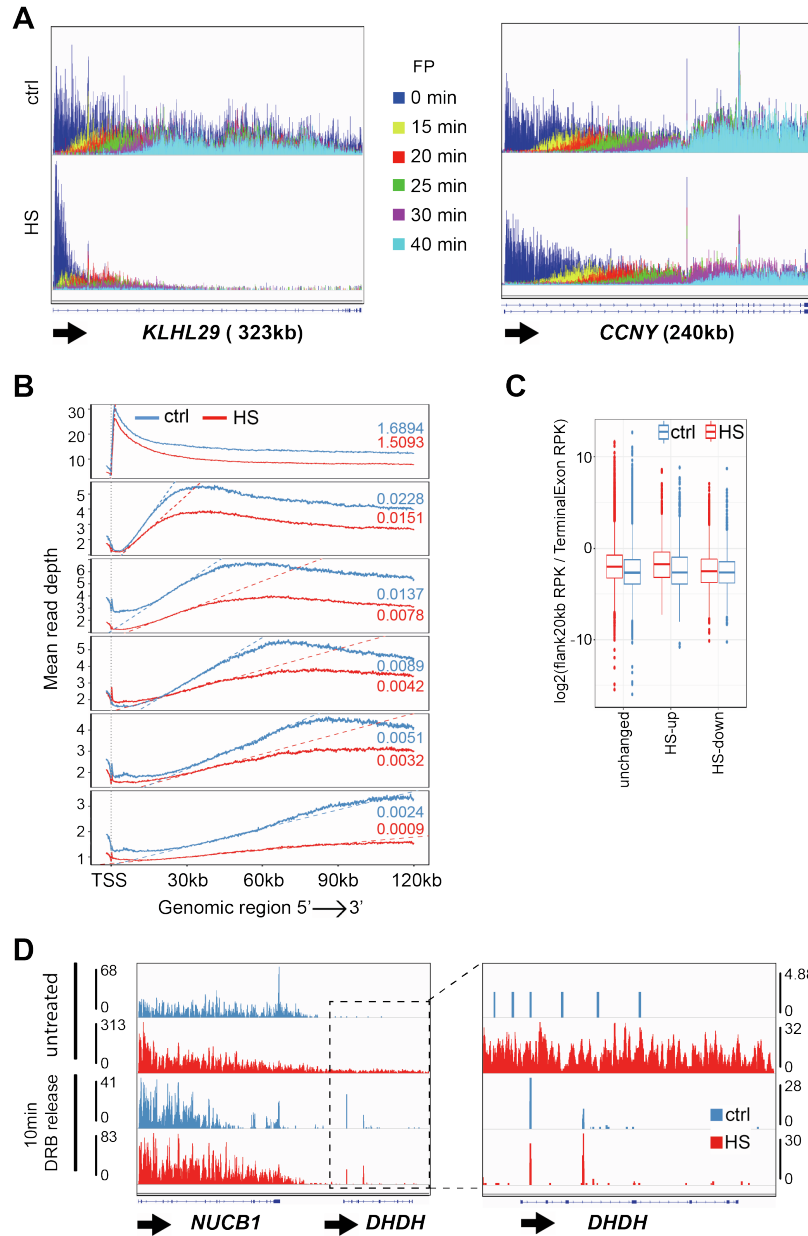

**Figure S6. Transcript elongation measurement by Flavopiridol/TT<sub>chem</sub>-seq, related to Figure 3.** **A.** IGV genome browser view of FP/TT<sub>chem</sub>-seq for the *KLHL29* and *CCNY* genes. **B.** Coverage plots of strand-specific FP/TT<sub>chem</sub>-seq. The dashed lines and the numeric labels indicate the slope of the rear end of the receding transcription wave for each condition. **C.** Boxplot of readthrough ratios for HS up-regulated genes (n= 1099), HS down-regulated genes (n= 1831) and unchanged genes (16957). **D.** IGV genome browser view of TT<sub>chem</sub>-seq ('untreated') and DRB/TT<sub>chem</sub>-seq ('10 min DRB release'), showing readthrough into the *DHDH* gene from the upstream *NUCB1* gene. Note that no HS-independent *DHDH* transcription is detectable after DRB release.

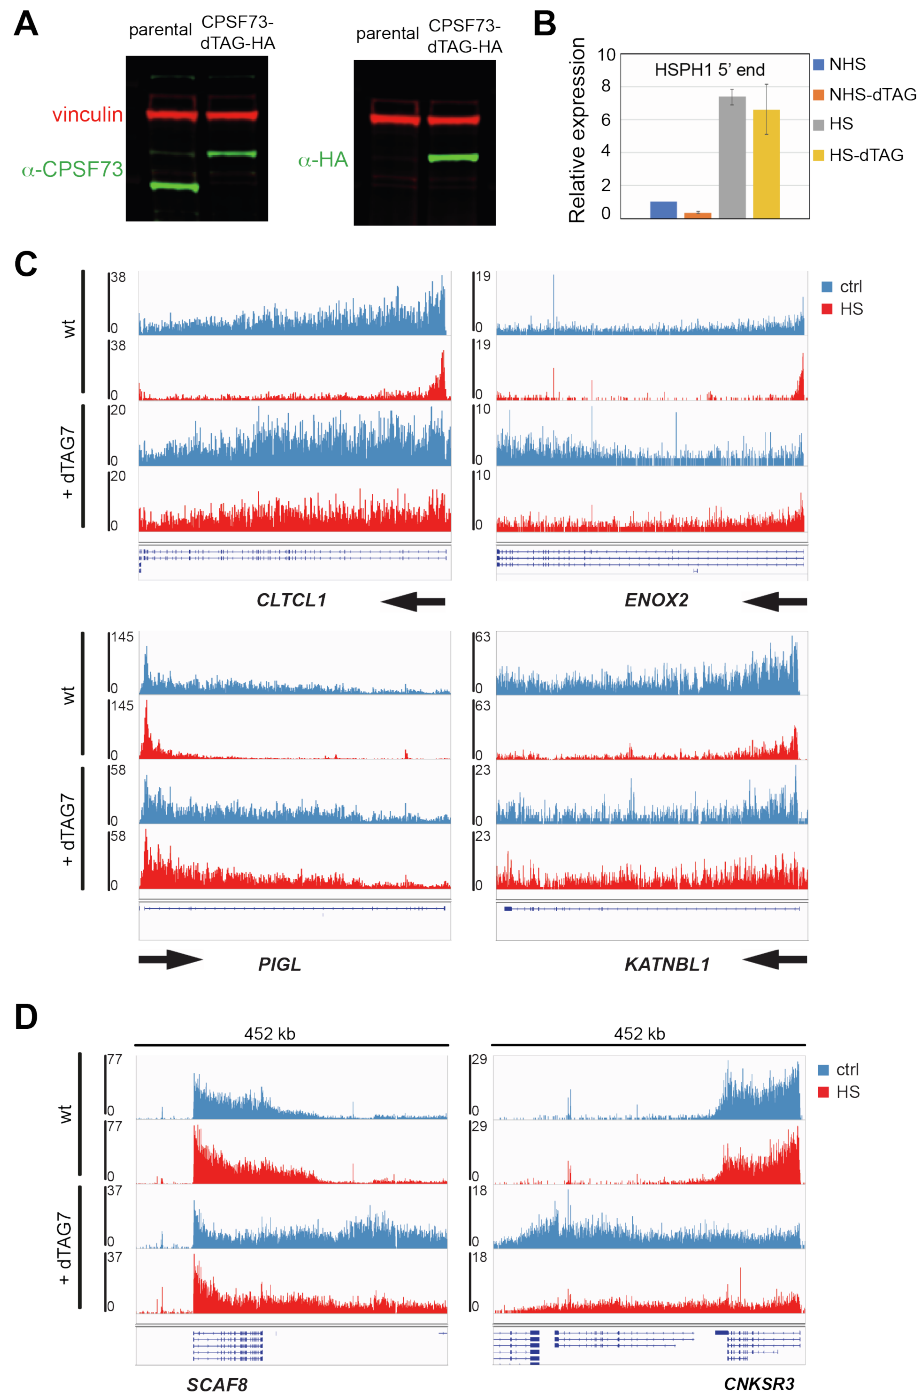

**Figure S7. CPSF73 (dTAG) cell line and, related to Figure 4.**

**A.** Western blot analysis of CPSF73 (dTAG)-HA cells. Vinculin is used as a loading control. **B.** qPCR quantification of nascent RNA near the 5'-end of the HS-activated *HSPH1* gene, relative to *GAPDH*, normalized to the control. Average of three biological replicates, error bars indicate  $\pm$ SD. **C.** IGV genome browser views of TT<sub>chem</sub>-seq for 4 additional example genes in cells exposed to HS (or not), without (WT) or with CPSF73 depletion (+dTAG7). **D.** As in C, but examples of the readthrough observed downstream of canonical TESs at gene 'ends'.

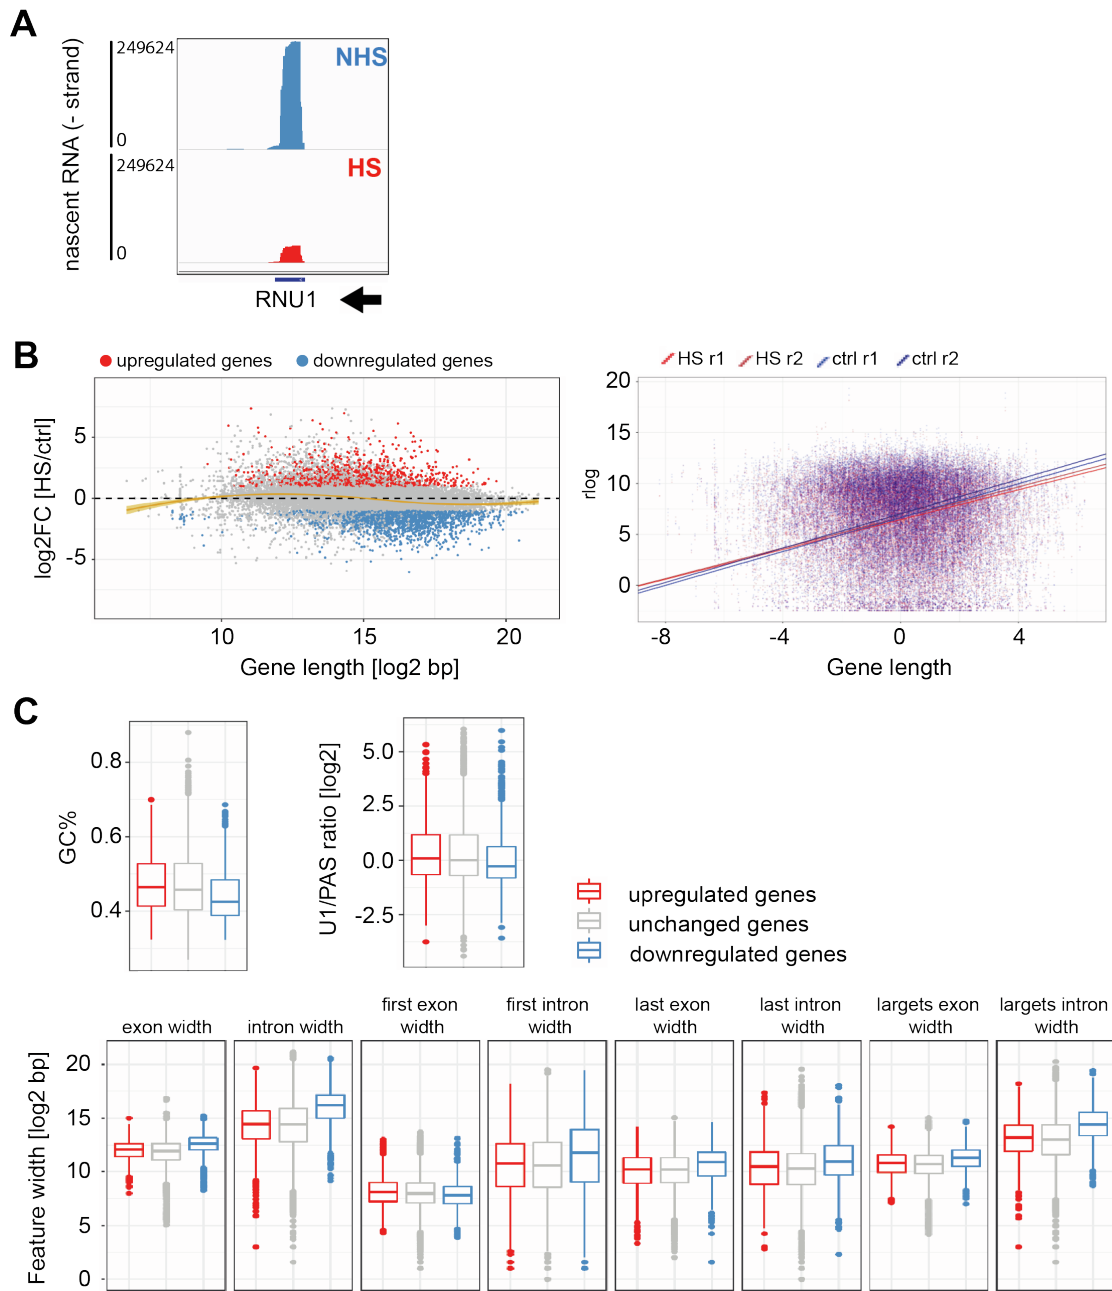

**Figure S8. Genomic features of HS downregulated genes, related to Figure 5.** **A.** IGV genome browser view of TT<sub>chem</sub>-seq for the *RNU1* gene. NHS, no heat shock. **B. Left**, scatterplot showing the gene width distribution of significant up- and down-regulated genes. Unchanged genes in grey and the Loess line in yellow. **Right**, plot showing the HS dependent relationship between gene-width and transcript abundance. Gene widths were log2 transformed before being mean centred, and are shown plotted against normalised abundance (rlog) for each sample. A linear regression line was calculated through the points for each sample individually. The slope of each line yielded a gene-width coefficient that was compared between HS and CTRL conditions using a t-test. **C.** Box plots of genomic features.

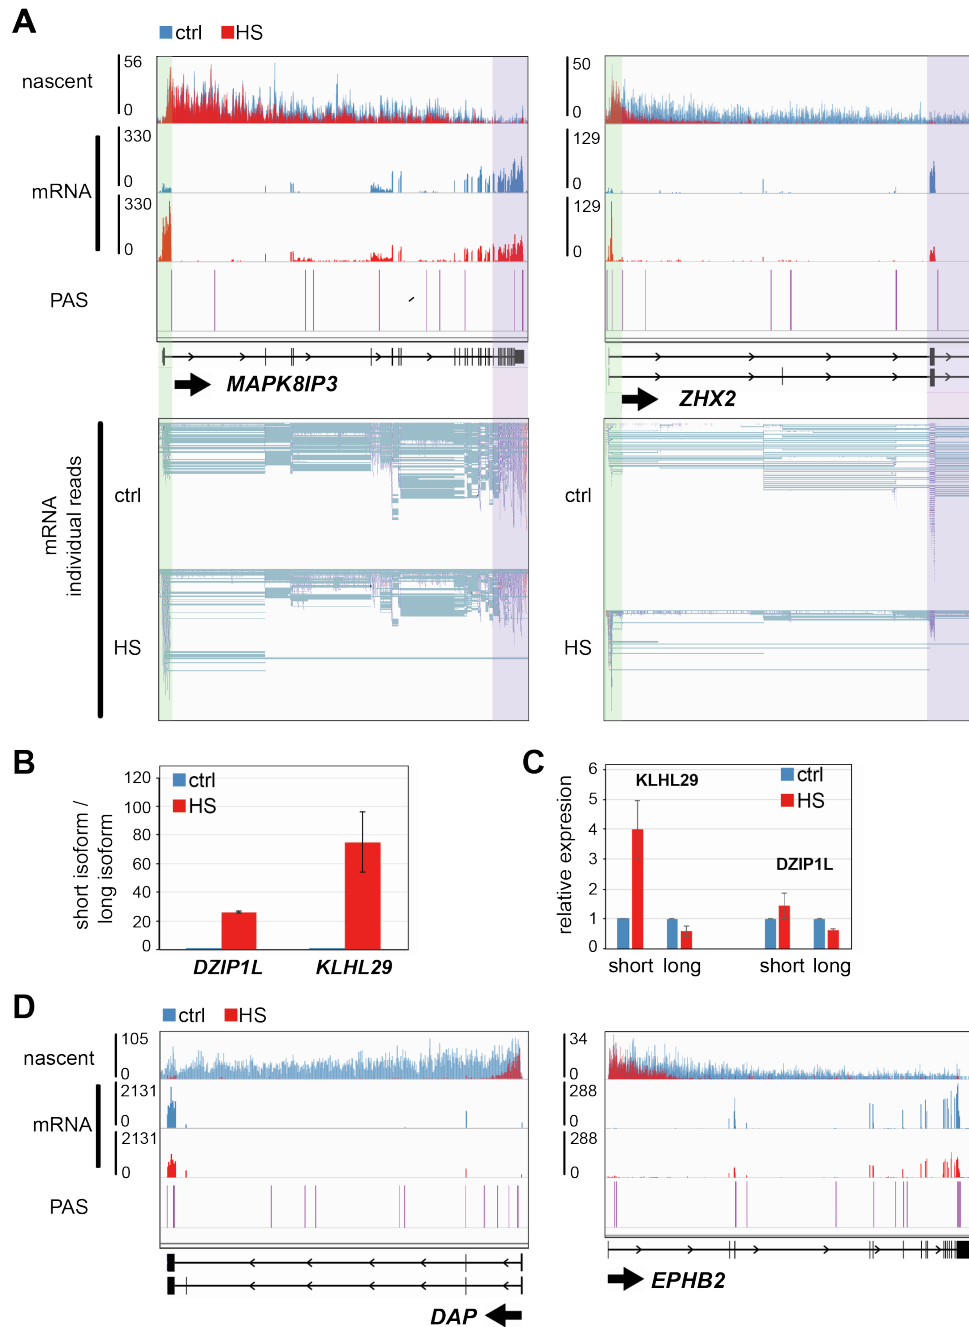

**Figure S9. mRNA production after HS, related to Figure 6.**

**A.** IGV genome browser view of TT<sub>chem</sub>-seq, Neo-mRNAseq, and PASs (Wang et al, 2018) for the *MAPK8IP3* and *ZHX2* genes in MRC5-VA cells. In the mRNA individual reads (bottom panels), blue indicates the (+) strand and red the (-) strand. **B.** qPCR quantification of newly synthesized short isoform (Neo-) mRNA from *DZIP1L* and *KLHL29*; relative to the long isoform, normalized to control. Average of three biological replicates, error bars indicate  $\pm$ SD. **C.** qPCR quantification of short and long isoforms of *DZIP1L* and *KLHL29* (total) mRNA, relative to GAPDH, normalized to control. Average of three biological replicates, error bars indicate  $\pm$ SD. **D.** IGV genome browser views as in A.

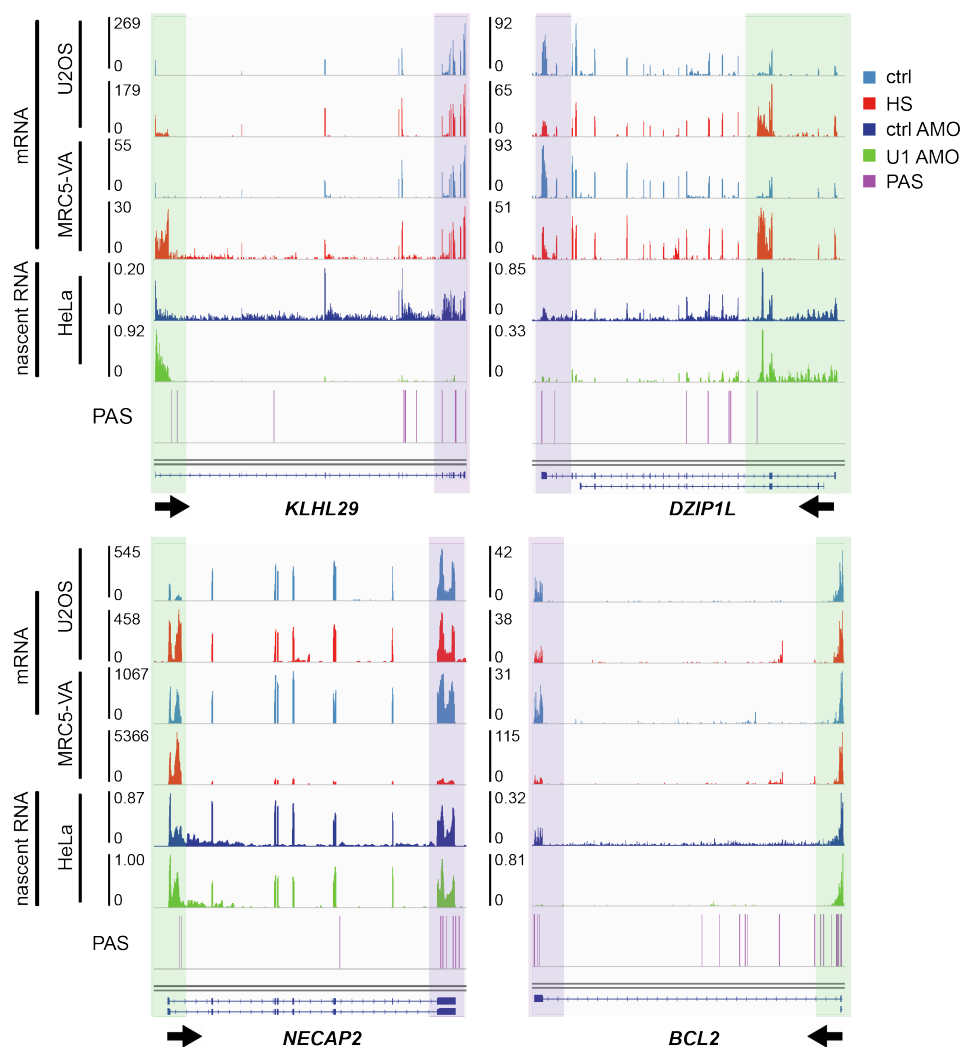

**Figure S10. Transcription and mRNA production after heat shock closely resembles inhibition of U1 telescripting, related to Figure 7.**

IGV genome browser views for the *KLHL29*, *DZIP1L*, *NECAP2* and *BCL2* genes, showing RNA-seq from U2OS cells (Seifert et al., 2015), Neo-mRNA-seq in MRC5-VA cells and nascent RNA from HeLa cells treated either with ctrl- or U1-AMO (So et al., 2019). PASs from the PolyA\_DB database (Wang et al., 2018).

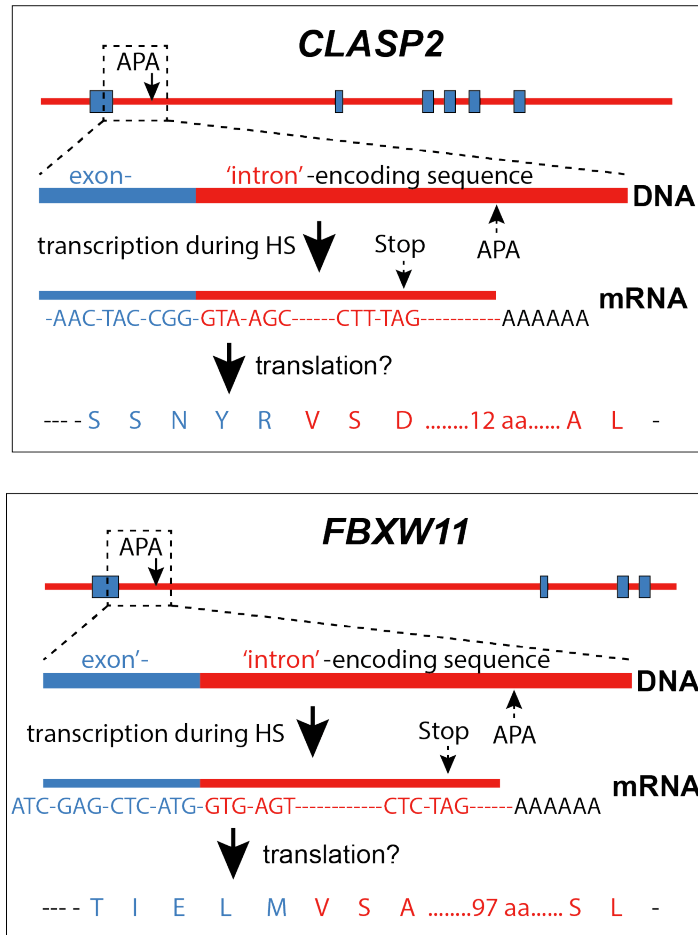

**Figure S11. Novel proteins library generation, related to Figure 7.**  
Schematic representation of potential novel protein products for CLASP2 and FBXW11 genes.



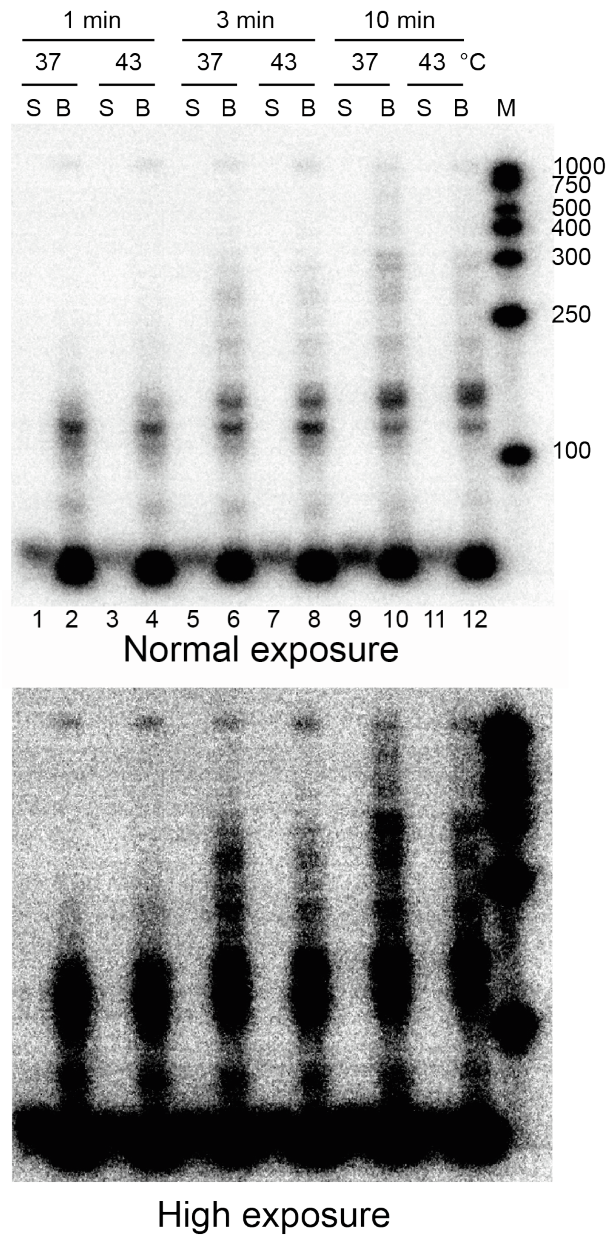

**Figure S12. The transcription elongation rate is not noticeably increased at 43°C *in vitro*, related to Figure 3.** Using immobilized templates, transcripts were first radioactively labeled by ATP, UTP, CTP (AUC) (with  $\alpha$ -P<sup>32</sup> UTP), then washed twice, preincubated at 37°C or 43°C for 2 min, before chasing with 100  $\mu$ M (non-radioactive) AUGC for the times indicated. S, supernatant. B, immobilized transcription template. Please note that rather than increasing activity and rate, incubation at 43°C appears to be slightly detrimental under these conditions, where only purified RNAPII is present in the reaction. A similar lack of elongation rate increases at elevated temperature was observed in experiments with pure yeast RNAPII (performed at 30° (optimal growth temperature for *S. cerevisiae*), 35° and 40°C) (data not shown).
